# Supplementary material
Source: PubMed Central journal article supplement (PMC3309749)
Supplement: 1119061109_st01.pdf [file 1119061109_st01.pdf]

| table S1 Summary of contigs containing template repeat/ variable repeat pairs and RTs. Variable region sequences are in Fig. S1. |         |        |        |                          |                 |                |                                               |                                                                                 |           |           |         |           |                                               |                                                  |          |      |                           |                                                      |          |               |    |                 |             |             |              |    |    |
|----------------------------------------------------------------------------------------------------------------------------------|---------|--------|--------|--------------------------|-----------------|----------------|-----------------------------------------------|---------------------------------------------------------------------------------|-----------|-----------|---------|-----------|-----------------------------------------------|--------------------------------------------------|----------|------|---------------------------|------------------------------------------------------|----------|---------------|----|-----------------|-------------|-------------|--------------|----|----|
| Contig name                                                                                                                      | Subject | Length | Family | Variable region          | ORF Coordinates | RT Coordinates | Repeated Regions                              | BLASTp/NR (orf containing variable region)                                      |           |           |         |           |                                               | Phyre2 structure prediction over variable region |          |      |                           | Phyre2 structure prediction over non-variable region |          |               |    | GC-only near VR |             |             |              |    |    |
|                                                                                                                                  |         |        |        |                          |                 |                |                                               | Name                                                                            | E-value   | %Identity | %Length | Name      | Model (P98)                                   | Confidence                                       | Coverage | Name | Model (P98)               | Confidence                                           | Coverage | C-type lectin | lg |                 | LRR         | Helix in VR | Helix in ORF |    |    |
| 1013_scaffold1563                                                                                                                | 1013    | 42703  | N      | 22583-22683              | 16207-22752     | 23414-24001    | 22583-22683 - 22869-22969                     | putative phage head-tail adaptor [Capnocytophaga sp. oral taxon 329 str. F0087] | 332879328 | 36%       | 91%     | 0         | None                                          | N/A                                              | N/A      | N/A  | LRR                       | 30ja                                                 | 95%      | 12%           |    | X               | No          | 8607-8632   | No           | No |    |
| 1013_scaffold1713                                                                                                                | 1013    | 13658  | N      | 8562-8788                | 9807-8650       | 7231-6851      | 7998-8136 - 14041-14129 - 13625               | None                                                                            | N/A       | N/A       | N/A     | N/A       | None                                          | N/A                                              | N/A      | N/A  | None                      | N/A                                                  | N/A      | N/A           |    |                 |             |             |              | No | No |
| 1013_scaffold1877                                                                                                                | 1013    | 19577  | M/P    | 14674-14762              | 15694-14669     | 13625          | 14674-14762                                   | Chain A, Major Tropism Determinant U1 Variant                                   | 78101014  | 29%       | 99%     | 6.00E-20  | MTD                                           | 2iou                                             | 100%     | 87%  | None                      | N/A                                                  | N/A      | N/A           | X  |                 |             | No          |              | No |    |
| 1013_scaffold24                                                                                                                  | 1013    | 47751  | M      | 40232-40356              | 41594-40227     | 39050-38541    | 39459-39555 - 40230-40345                     | None                                                                            | N/A       | N/A       | 0%      | 0         | None                                          | N/A                                              | N/A      | N/A  | None                      | N/A                                                  | N/A      | N/A           |    |                 | 40199-40224 | No          | No           |    |    |
| 1013_scaffold3125                                                                                                                | 1013    | 94489  | S/M    | 47601-47741              | 49656-47602     | 45627-46016    | 46739-46866 - 47606-47735                     | None                                                                            | N/A       | N/A       | N/A     | N/A       | None                                          | N/A                                              | N/A      | N/A  | None                      | N/A                                                  | N/A      | N/A           |    |                 |             |             |              | No | No |
| 1013_scaffold47                                                                                                                  | 1013    | 34299  | S/P    | 18094-18194              | 19098-18088     | 17075-16464    | 17450-17550 - 18094-18194                     | Chain A, Major Tropism Determinant I1 Variant                                   | 78101013  | 29%       | 100%    | 8.00E-18  | MTD                                           | 2iou                                             | 100%     | 88%  | None                      | N/A                                                  | N/A      | N/A           | X  |                 |             | No          |              | No |    |
| 1013_scaffold7838                                                                                                                | 1013    | 6526   | N      | 1720-1824                | 2397-544        | 3244-2645      | 3782-3882 - 1728-1828                         | probable transcriptional regulator-related protein [Clostridium botulinum Bf]   | 168183960 | 38%       | 37%     | 3.00E-29  | cadherin-1                                    | 3q2v                                             | 98%      | 74%  | None                      | N/A                                                  | N/A      | N/A           |    | X               |             | No          |              | No |    |
| 2011_scaffold1080                                                                                                                | 2011    | 5342   | N      | 3661-3791                | 1782-3782       | 4737-5333      | 3664-3779                                     | None                                                                            | N/A       | N/A       | N/A     | N/A       | None                                          | N/A                                              | N/A      | N/A  | None                      | N/A                                                  | N/A      | N/A           |    |                 | 3793-3818   | No          | No           |    |    |
| 2011_scaffold13                                                                                                                  | 2011    | 55843  | S/M    | 3365-3503                | 4519-3338       | 2091-2657      | 3148-3248 - 5598-5725                         | None                                                                            | N/A       | N/A       | N/A     | N/A       | None                                          | N/A                                              | N/A      | N/A  | None                      | N/A                                                  | N/A      | N/A           |    |                 | 3507-3531   | Yes         | No           |    |    |
| 2011_scaffold152                                                                                                                 | 2011    | 9198   | P      | 4927-5120                | 4094-5104       | 6103-6714      | 4091-5098                                     | Chain A, Major Tropism Determinant U1 Variant                                   | 78101014  | 30%       | 100%    | 1.00E-19  | MTD                                           | 2iou                                             | 100%     | 97%  | None                      | N/A                                                  | N/A      | N/A           | X  |                 | No          |             | 4991-5002    |    |    |
| 2011_scaffold33                                                                                                                  | 2011    | 43586  | M      | 39471-39601              | 40577-39477     | 38443-37858    | 38849-38976 - 39482-39609                     | Chain A, Major Tropism Determinant U1 Variant                                   | 78101014  | 31%       | 92%     | 4.00E-20  | MTD                                           | 2iou                                             | 100%     | 90%  | None                      | N/A                                                  | N/A      | N/A           | X  |                 | 39618-39643 | Yes         | No           |    |    |
| 2016_scaffold57                                                                                                                  | 2016    | 45505  | S/M    | 7111-7261                | 8140-7073       | 6002-5340      | 6556-6578 - 7175-7197                         | ORF35 [Vibrio phage VHML]                                                       | 27311203  | 32%       | 95%     | 4.00E-36  | MTD                                           | 2iou                                             | 100%     | 90%  | None                      | N/A                                                  | N/A      | N/A           | X  |                 | 7019-7044   | No          | 7161-7170    |    |    |
| 2019_scaffold132                                                                                                                 | 2019    | 37433  | S      | 22045-22122              | 23251-22016     | 21129-20662    | 21703-21780 - 22045-22122                     | None                                                                            | N/A       | N/A       | N/A     | N/A       | MTD                                           | 2iou                                             | 99%      | 55%  | None                      | N/A                                                  | N/A      | N/A           | X  |                 | 21977-22001 | No          | No           |    |    |
| 2019_scaffold260                                                                                                                 | 2019    | 8655   | N      | 5422-5545                | 6937-5135       | 4547-3840      | 4920-5040 - 5148-5268                         | phage-related hypothetical protein [Rhodospirillum centenum SW]                 | 209964416 | 25%       | 56%     | 2.00E-13  | MTD                                           | 2iou                                             | 99%      | 45%  | None                      | N/A                                                  | N/A      | N/A           | X  |                 | No          |             | No           |    |    |
| 2020_scaffold1264                                                                                                                | 2020    | 27831  | N      | 4681-4794                | 8920-4610       | 3667-3248      | 4306-4406 - 4676-4776                         | putative phage head-tail adaptor [Capnocytophaga sp. oral taxon 329 str. F0087] | 332879328 | 37%       | 99%     | 0         | Clec                                          | 1y4j                                             | 90%      | 23%  | LRR                       | 30ja                                                 | 97%      | 16%           | X  | X               | No          |             | 4660-4670    |    |    |
| 2200_scaffold1335                                                                                                                | 2200    | 38128  | S/M    | 11391-11503              | 9722-11524      | 12112-12819    | 11625-11745 - 11397-11517                     | phage-related hypothetical protein [Rhodospirillum centenum SW]                 | 209964451 | 28%       | 55%     | 4.00E-14  | MTD                                           | 2iou                                             | 99%      | 45%  | None                      | N/A                                                  | N/A      | N/A           | X  |                 | No          |             | No           |    |    |
| 2200_scaffold2278                                                                                                                | 2200    | 36736  | S/M    | 34681-34807              | 34134-35988     | 33449-33886    | 32701-32801 - 34226-34826                     | probable transcriptional regulator-related protein [Clostridium botulinum Bf]   | 168183960 | 37%       | 37%     | 9.00E-33  | ep-cadherin                                   | 1q5c                                             | 98%      | 24%  | None                      | N/A                                                  | N/A      | N/A           |    | X               | 34701-34725 | Yes         | No           |    |    |
| 2200_scaffold2352                                                                                                                | 2200    | 13046  | M      | 9381-9735                | 10503-9463      | 8395-7733      | 8972-8972 - 9526-9626                         | ORF35 [Vibrio phage VHML]                                                       | 27311203  | 32%       | 96%     | 4.00E-33  | MTD                                           | 2iou                                             | 100%     | 90%  | None                      | N/A                                                  | N/A      | N/A           | X  |                 | 9409-9434   | No          | No           |    |    |
| 2203_scaffold802                                                                                                                 | 2203    | 55338  | S/M    | 41681-41781              | 36628-41778     | 43266-43658    | 41651-41770 - 42437-42556                     | putative phage head-tail adaptor [Capnocytophaga sp. oral taxon 329 str. F0087] | 332879328 | 25%       | 68%     | 2.00E-63  | None                                          | N/A                                              | N/A      | N/A  | LRR                       | 30ja                                                 | 97%      | 15%           |    | X               | 41802-41827 | No          | No           |    |    |
| 2204_scaffold14                                                                                                                  | 2204    | 27737  | N      | 24988-25108              | 25707-24340     | 26558-25998    | 27017-27137 - 24988-25108                     | None                                                                            | N/A       | N/A       | N/A     | N/A       | None                                          | N/A                                              | N/A      | N/A  | cellulose-binding protein | 2yhg                                                 | 96%      | 21%           |    | X               | 25097-25121 | Yes         | No           |    |    |
| 2204_scaffold211                                                                                                                 | 2204    | 15588  | S      | 3262-3346                | 2021-3379       | 4204-4671      | 3464-3548 - 3262-3346                         | None                                                                            | N/A       | N/A       | N/A     | N/A       | Clec                                          | 1z70                                             | 97%      | 57%  | None                      | N/A                                                  | N/A      | N/A           | X  |                 | No          |             | No           |    |    |
| 2204_scaffold812                                                                                                                 | 2204    | 48707  | S/M    | 26241-26391              | 27332-26241     | 25178-24513    | 25676-25790 - 26259-26373                     | ORF35 [Vibrio phage VHML]                                                       | 27311203  | 33%       | 95%     | 2.00E-29  | MTD                                           | 2iou                                             | 100%     | 91%  | None                      | N/A                                                  | N/A      | N/A           | X  |                 | 26193-26217 | No          | No           |    |    |
| 2207_scaffold2979                                                                                                                | 2207    | 5560   | N      | 1731-1841                | 841-1890        | 2722-3183      | 2108-2258 - 1742-1892                         | None                                                                            | N/A       | N/A       | N/A     | N/A       | MTD                                           | 2iou                                             | 98%      | 72%  | None                      | N/A                                                  | N/A      | N/A           | X  |                 | No          |             | No           |    |    |
| 2207_scaffold314                                                                                                                 | 2207    | 8886   | N      | 4081-4231                | 2597-4276       | 5219-5638      | 4471-4529 - 4101-4159                         | putative phage head-tail adaptor [Capnocytophaga sp. oral taxon 329 str. F0087] | 332879328 | 48%       | 98%     | 2.00E-135 | MTD                                           | 2iou                                             | 97%      | 43%  | None                      | N/A                                                  | N/A      | N/A           | X  |                 | No          |             | 4220-4230    |    |    |
| 2209_scaffold1451                                                                                                                | 2209    | 19156  | S/M    | 1945-1988                | 2574-715        | 3412-2813      | 3993-4036 - 1945-1988                         | probable transcriptional regulator-related protein [Clostridium botulinum Bf]   | 168183960 | 39%       | 37%     | 3.00E-33  | cadherin-1                                    | 3q2v                                             | 100%     | 77%  | None                      | N/A                                                  | N/A      | N/A           |    | X               | 1989-2013   | Yes         | No           |    |    |
| 2209_scaffold2350                                                                                                                | 2209    | 33654  | S      | 25528-25628              | 25636-25046     | 24047-24652    | 23576-23676 - 25528-25628                     | None                                                                            | N/A       | N/A       | N/A     | N/A       | None                                          | N/A                                              | N/A      | N/A  | None                      | N/A                                                  | N/A      | N/A           |    |                 | No          |             | No           |    |    |
| 2209_scaffold441                                                                                                                 | 2209    | 29952  | N      | 6471-6591                | 5839-7545       | 5166-5582      | 4412-4512 - (6484:6584 AND 16553:16653)       | gp427 [Bacillus phage G]                                                        | 34749644  | 42%       | 28%     | 2.00E-11  | receptor-type tyrosine-protein phosphatase mu | 2v5y                                             | 100%     | 65%  | None                      | N/A                                                  | N/A      | N/A           |    | X               | No          |             | No           |    |    |
| 2209_scaffold64                                                                                                                  | 2209    | 42319  | N      | 21121-21291; 34511-34631 | 33896-34834     | 19555-19148    | 20259-20359 - (20919:21019 AND 34,194:34,294) | None                                                                            | N/A       | N/A       | N/A     | N/A       | None                                          | N/A                                              | N/A      | N/A  | None                      | N/A                                                  | N/A      | N/A           |    |                 | 34141-34165 | Yes         | No           |    |    |
| 2210_scaffold709                                                                                                                 | 2210    | 36303  | M      | 11132-11252              | 11900-10329     | 12744-12145    | 13118-13238 - 11132-11252                     | TII protein [Clostridium lentocellum DSM 5427]                                  | 326791598 | 27%       | 50%     | 3.00E-10  | endoglucanase                                 | 2c2c                                             | 100%     | 41%  | None                      | N/A                                                  | N/A      | N/A           |    | X               | No          |             | 11181-11190  |    |    |
